# Supplementary material for: The effect of multiple ion substitutions on halide ion migration in perovskite solar cells
Source: Royal Society of Chemistry journal article supplement (doi:10.1039/d2ma00619g), 2022-01-01
Supplement: d2ma00619g1.pdf [file d2ma00619g1.pdf]

# The Effect of Multiple Ion Substitutions on Halide Ion Migration in Perovskite Solar Cells

Samuel R. Pering<sup>1\*†</sup>, Petra J. Cameron<sup>1</sup>

1. Department of Chemistry, University of Bath, Bath BA2 7AY, UK

† Samuel R. Pering current address: Department of Materials, Loughborough University, LE11 3TU, UK

## SUPPORTING INFORMATION

### METHODS:

#### PEROVSKITE PRECURSOR SYNTHESIS:

FAPbI<sub>3</sub> perovskites were made using a 1.25:1.25 molar ratio of formamidinium iodide (FAI, Greatcell Solar) and PbI<sub>2</sub> (Sigma, 99 %) in a solution using a solvent ratio of 4:1 DMF:DMSO. For the substituted perovskites, precursor solutions for the triple-cation perovskite were made using the proportions and methods reported by Saliba *et al.*<sup>1</sup>

All films were deposited at 5000 rpm for 30 seconds, with an ethyl acetate antisolvent being used 15 seconds into the spin-coating method. Films were annealed at 150 °C unless otherwise stated.

#### DEVICE FABRICATION

Either Fluorine doped Tin Oxide glass (FTO) (Solaronix, unless otherwise specified) with a sheet resistance of 15 Ω/square or microscope glass (VWR) was used. For film measurements, the glass was used as purchased. Glass was cut to 25 mm × 25 mm pieces. For Solar Cell fabrication a 5 mm strip was etched from the middle of the glass using 2 M HCl (Sigma) and Zn powder (Sigma) before the cleaning step.

Glass was cleaned in an ultrasonic bath at a temperature of 80 °C using the following solvents: 2 % Hellmanex in MilliQ water, water, acetone, isopropanol and ethanol. Following the final step the glass was dried using N<sub>2</sub> gas and placed in a UV/Ozone cleaner for 20 minutes.

The HTM solution contained 50 mgmL<sup>-1</sup> Nickel(II) acetate hexahydrate (Sigma, 99.998 %) in 2-methoxy ethanol (Sigma, 99.8 %). 12 µL ethanolamine (Sigma, 98 %) was added to this solution, and it was filtered before use. Films were deposited at 3000 rpm for 30 seconds and annealed at 500 °C for 30 minutes.

A 1.25:1.25 M solution of MAI and PbI<sub>2</sub> was dissolved in a 4:1 mixture of DMF and DMSO at 50 °C – also filtered before use. Perovskite films were formed by spin-coating at 4000 rpm for 30 seconds. Ethyl acetate (Sigma, 99.8 %) was used as the antisolvent, deposited 6 seconds into the spin-coating process. Films were left to anneal at 100 °C for 15 minutes.

After cooling, a solution of 20 mgmL<sup>-1</sup> PC<sub>71</sub>BM (Ossila, 95 %) in chlorobenzene was filtered, and deposited onto the perovskite films for 30 seconds at 3000 rpm. A final spin-coating step used a solution of 0.5 mgmL<sup>-1</sup> bathocuproine (Sigma, 96 %) in ethanol, deposited at 6000 rpm for 30 seconds.

A 60 nm silver (Alfa Aesar) contact was deposited by thermal evaporation.

### **ANALYSIS:**

*Crystallography:* A Bruker axs D8 advance powder x-ray diffractometer with a Cu K $\alpha$  source and Ge monochromator was used for Powder/Thin film X-ray diffraction. Measurements were taken from 2 $\theta$  values of 5 ° to 80 °.

*UV/Vis Spectroscopy:* Thin film optical Transmission and Reflectance measurements were performed on a PerkinElmer Lambda 750S UV/Vis spectrometer, from 1000 nm to 250 nm. Absorption was calculated as incident light – (transmission + reflectance).

*Atomic Force Microscopy:* AFM images were taken on a Nanosurf easyscan 2 FlexAFM system in dynamic mode using a force of 20 nN. A ContAl0F Tip was used for measurements.

*JV Curves:* Current density-voltage curves were measured using a 2400 series Sourcemeeter (Keithley Instruments), under simulated AM1.5 sunlight at 100 mW cm<sup>-2</sup> irradiance generated using a class AAA solar simulator (TS-Space Systems) at room temperature in air. The intensity was calibrated using a certified silicon reference cell (Fraunhofer). The active area of the pixels was 0.0625 cm<sup>2</sup>, measured using a mask of the same area. Voltage scans were taken from 1.1 V (preconditioning time 5s) to 0 V at 100 mVs<sup>-1</sup>. Measurements were taken in air at room temperature. *Error Analysis:* Solar simulator calibrated to within accepted range for reference cell current density – potential systematic error of  $\pm 0.5$  mAcm<sup>-2</sup> (max 3% error based on lowest mean current density).

*Electrochemical Impedance Spectroscopy:* EIS measurements were taken on a Solartron Modulab, measurements were taken in air under 73 mW cm<sup>-2</sup> illumination at open circuit between 1MHz and 5mHz with a 10 mV perturbation. A 560 nm blue LED was used as the illumination source. The temperature of the cell was controlled by a Peltier element. Devices were measured within 1 day of fabrication. *Error Analysis:* Temperature of Peltier element correct to 4 decimal places. Errors from calculations based on fitting provided in data. Random error – connections of solar cell to potentiostat.

## SUPPLEMENTARY FIGURES

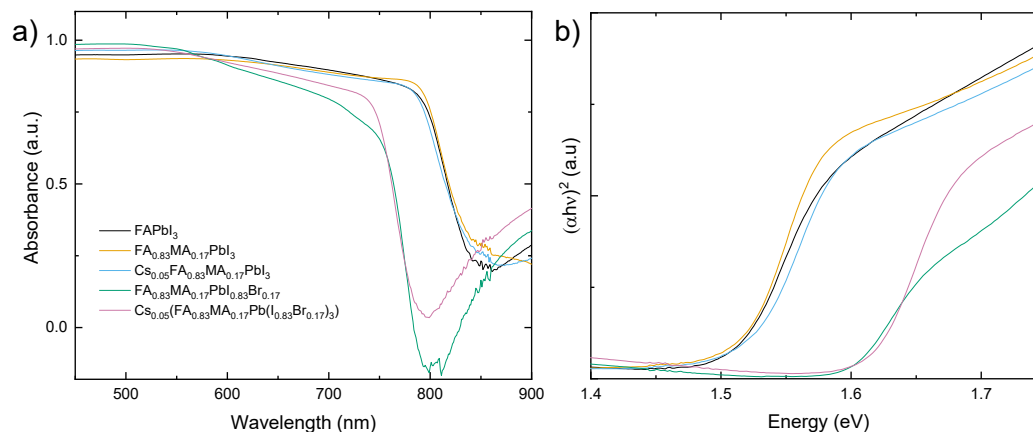

**Figure S1.** UV/Vis spectroscopy of the perovskite materials investigated through this study: a) absorbance and b) Tauc plot

**Table S1.** Average PSC parameters (with standard deviation over at least 15 pixels)

| Perovskite                                                                                                                           | Voltage (V) | Current Density (mAcm <sup>-2</sup> ) | Fill Factor (%) | Efficiency (%) | Champion Cell Efficiency (%) |
|--------------------------------------------------------------------------------------------------------------------------------------|-------------|---------------------------------------|-----------------|----------------|------------------------------|
| FAPbI <sub>3</sub>                                                                                                                   | 0.78 ± 0.01 | 16.31 ± 1.24                          | 62.50 ± 7.90    | 7.90 ± 1.08    | 9.58                         |
| FA <sub>0.83</sub> MA <sub>0.17</sub> PbI <sub>3</sub>                                                                               | 0.95 ± 0.04 | 18.16 ± 1.22                          | 62.23 ± 3.18    | 10.76 ± 1.15   | 11.40                        |
| Cs <sub>0.05</sub> (FA <sub>0.83</sub> MA <sub>0.17</sub> ) <sub>0.95</sub> PbI <sub>3</sub>                                         | 0.85 ± 0.01 | 17.41 ± 1.65                          | 57.79 ± 2.65    | 8.53 ± 0.88    | 10.16                        |
| FA <sub>0.83</sub> MA <sub>0.17</sub> Pb(I <sub>0.83</sub> Br <sub>0.17</sub> ) <sub>3</sub>                                         | 1.01 ± 0.04 | 16.72 ± 1.51                          | 52.41 ± 4.42    | 8.80 ± 0.88    | 10.10                        |
| Cs <sub>0.05</sub> (MA <sub>0.17</sub> FA <sub>0.83</sub> ) <sub>(0.95)</sub> Pb(I <sub>0.83</sub> Br <sub>0.17</sub> ) <sub>3</sub> | 0.97 ± 0.04 | 15.51 ± 1.81                          | 60.06 ± 4.07    | 8.99 ± 1.13    | 11.00                        |

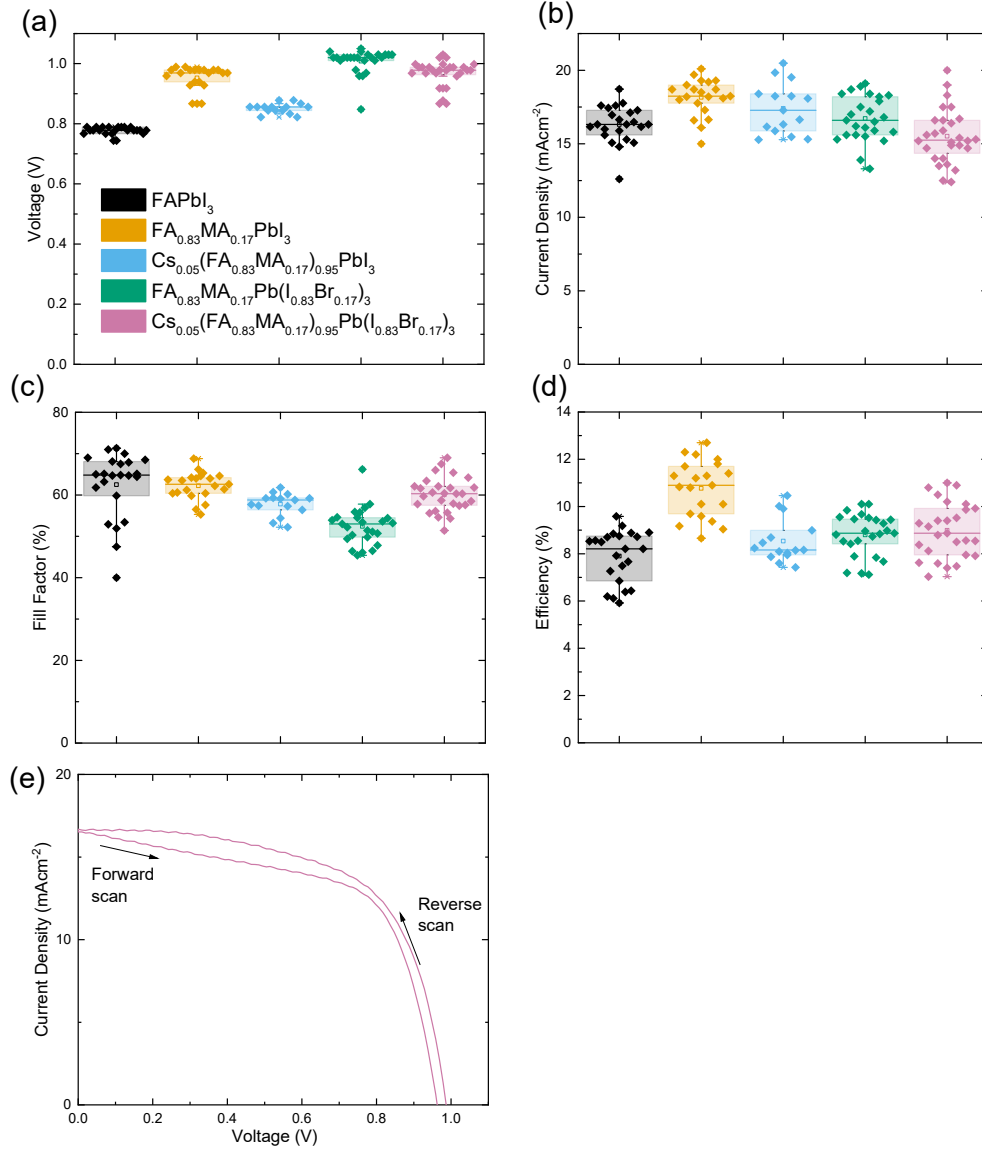

**Figure S2.** Box plots for VOC, JSC, Fill factor and efficiency for the cells, and e) JV curve for representative Cs<sub>0.05</sub>(MA<sub>0.17</sub>FA<sub>0.83</sub>)<sub>0.95</sub>Pb(I<sub>0.83</sub>Br<sub>0.17</sub>)<sub>3</sub> device

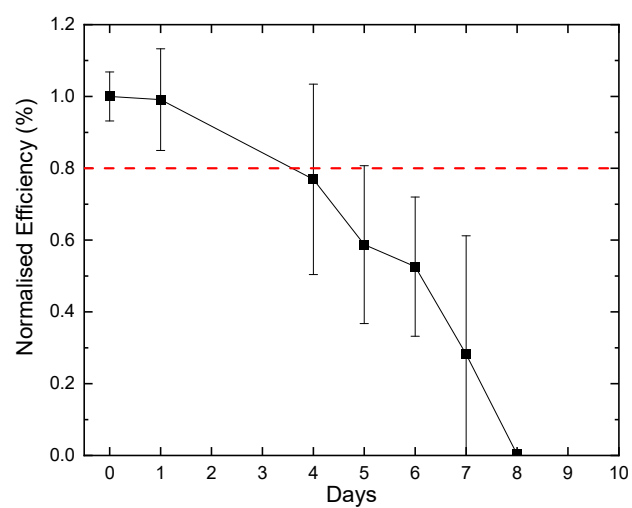

**Figure S3.** Normalised Photovoltaic stability of Formamidinium Lead Iodide, average over 6 pixels. Dashed line representing 80% efficiency. All cells were measured for impedance within 1 day of first PV measurement.

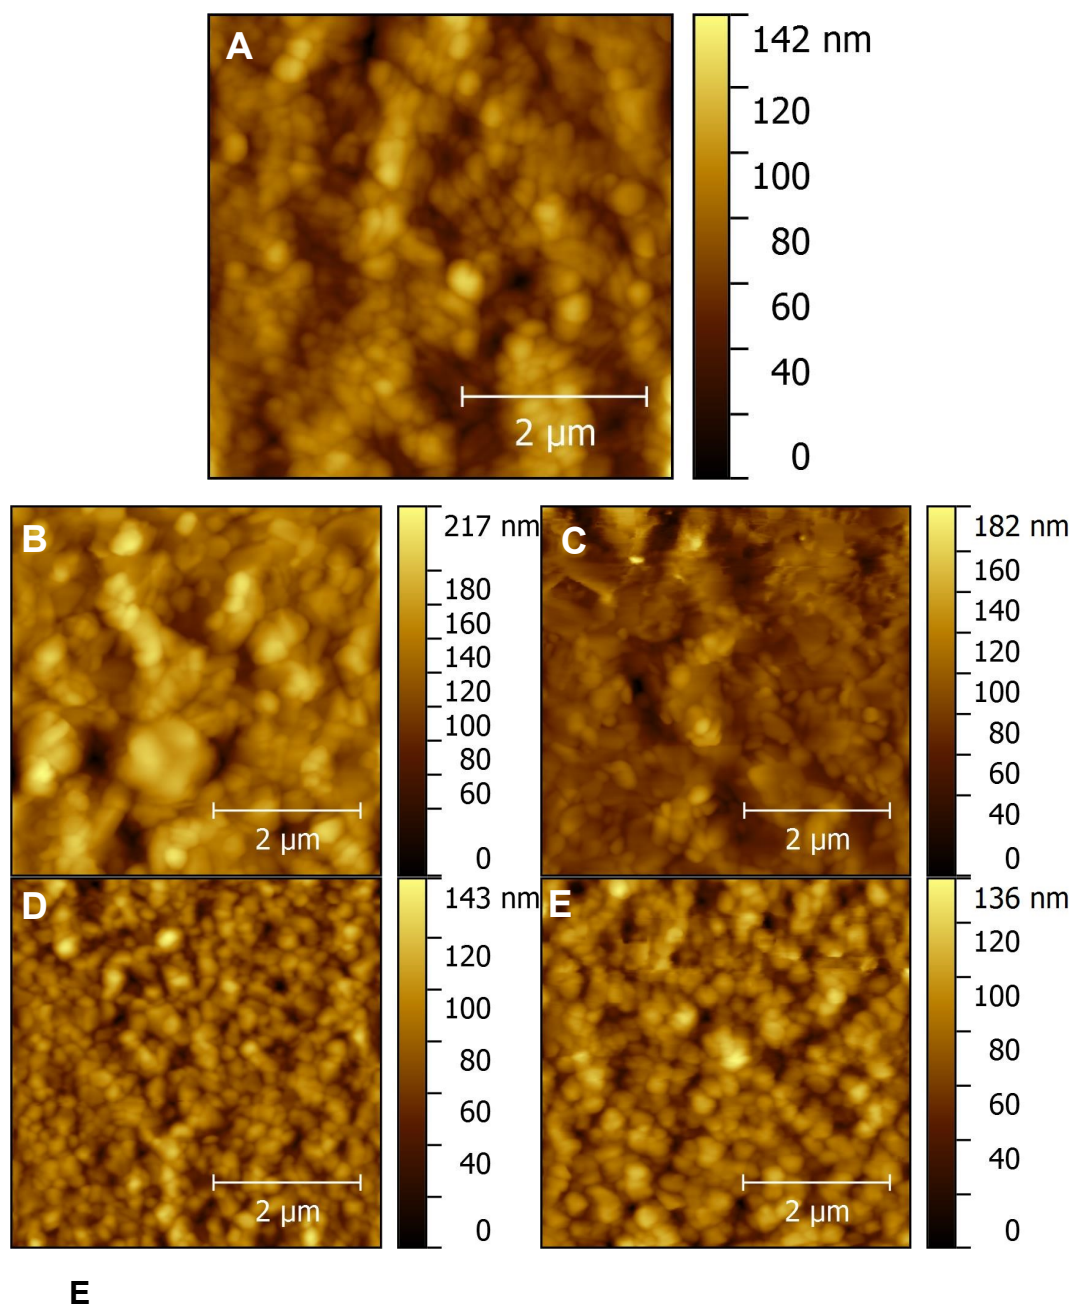

**Figure S4.** AFM images of **a)**  $\text{FAPbI}_3$ , **b)**  $\text{FA}_{0.83}\text{MA}_{0.17}\text{PbI}_3$ , **c)**  $\text{Cs}_{0.05}(\text{FA}_{0.83}\text{MA}_{0.17})_{0.95}\text{PbI}_3$ , **d)**  $\text{FA}_{0.83}\text{MA}_{0.17}\text{Pb}(\text{I}_{0.83}\text{Br}_{0.17})_3$  and **e)**  $\text{Cs}_{0.05}(\text{MA}_{0.17}\text{FA}_{0.83})_{0.95}\text{Pb}(\text{I}_{0.83}\text{Br}_{0.17})_3$

**Table S2.** Lattice parameter (a) and hydrogen bond length for a series of lead-halide based perovskite materials

| Material                                               | Structure    | Lattice parameter<br>a, (Å) | Hydrogen bond length<br>(Å) | Tolerance Factor | Notes                            | Ref. |
|--------------------------------------------------------|--------------|-----------------------------|-----------------------------|------------------|----------------------------------|------|
| MAPbI <sub>3</sub>                                     | Tetragonal   | -                           | 3.15-3.18                   | 0.95             |                                  | 2    |
|                                                        | Orthorhombic | -                           | 2.61-2.81                   |                  |                                  | 2    |
|                                                        | Cubic        | -                           | 3.12-3.52                   |                  |                                  | 2    |
|                                                        | Tetragonal   | 6.30                        | -                           |                  |                                  | 3    |
|                                                        | Tetragonal   | 6.28                        | 2.6<br>(average)            |                  | Computational                    | 4    |
| MA <sub>0.75</sub> FA <sub>0.25</sub> PbI <sub>3</sub> | Cubic        | 6.30                        | 2.6 (MA)<br>2.8 (FA)        |                  | Computational and average values | 4    |
| MA <sub>0.25</sub> FA <sub>0.75</sub> PbI <sub>3</sub> | Cubic        | 6.33                        | 2.6 (MA)<br>2.7 (FA)        |                  |                                  | 4    |
| MA <sub>0.2</sub> FA <sub>0.8</sub> PbI <sub>3</sub>   | -            | 6.34                        | -                           |                  |                                  | 3    |
| FAPbI <sub>3</sub>                                     | Cubic        | 6.36                        |                             | 1.04             |                                  | 3    |
|                                                        | Cubic        | 6.36                        | 2.75-3.0                    |                  |                                  | 5    |
|                                                        | Cubic        | 6.34                        | 2.7                         |                  | Computational                    | 4    |
| Cs <sub>0.15</sub> FA <sub>0.85</sub> PbI <sub>3</sub> | Cubic        | -                           | 2.65-2.75                   |                  | Computational                    | 6    |
| CsPbI <sub>3</sub>                                     | Cubic        | 6.29                        | -                           | 0.89             | High Temperature measurement     | 7    |
| FAPbI <sub>3</sub> -MABr                               | Cubic        | 6.31                        |                             |                  |                                  | 8    |
| MAPbBr <sub>3</sub>                                    | Cubic        | 5.90                        |                             | 0.99             |                                  | 9    |
|                                                        | -            | 8.44                        |                             |                  | High pressure measurement        | 10   |
|                                                        | -            | 8.46                        | 2.8-3.0                     |                  | Tilted structure                 | 11   |
| FAPbBr <sub>3</sub>                                    | Cubic        | -                           | 2.4                         |                  | Thin-film                        | 12   |
| CsPbBr <sub>3</sub>                                    | Cubic        |                             | 2.4                         |                  | Thin-film                        | 12   |
|                                                        | Cubic        | 5.87                        |                             |                  | Computational                    | 13   |

### Electrochemical Impedance Spectroscopy Figures:

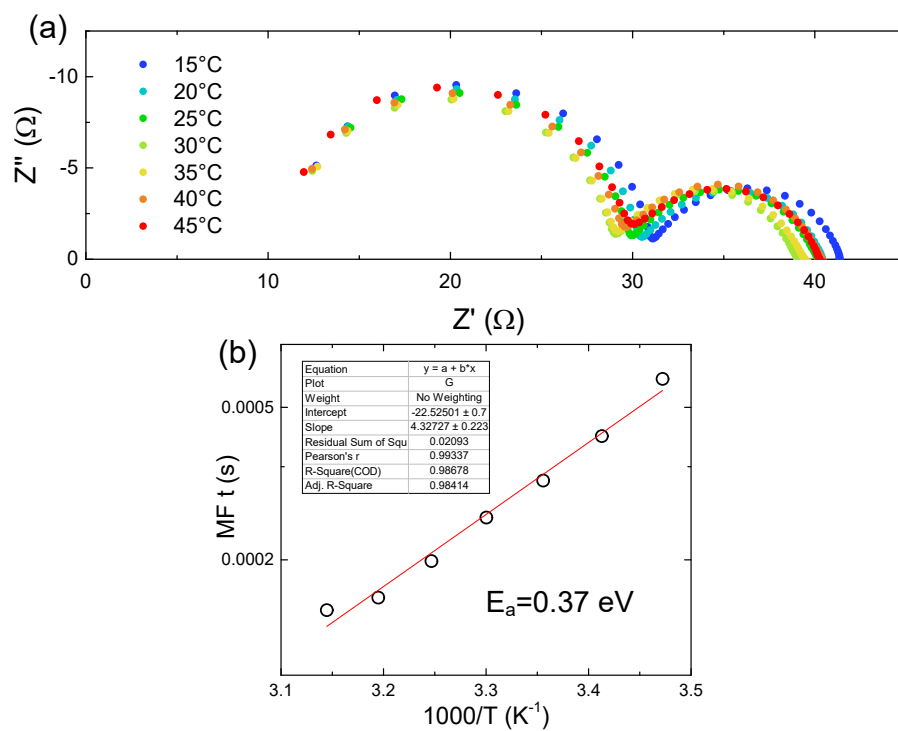

**Figure S5.** The change in FAPI impedance with temperature: a) Nyquist plots, b) Arrhenius plot for the mid-frequency feature with inset example of error for activation energy calculations

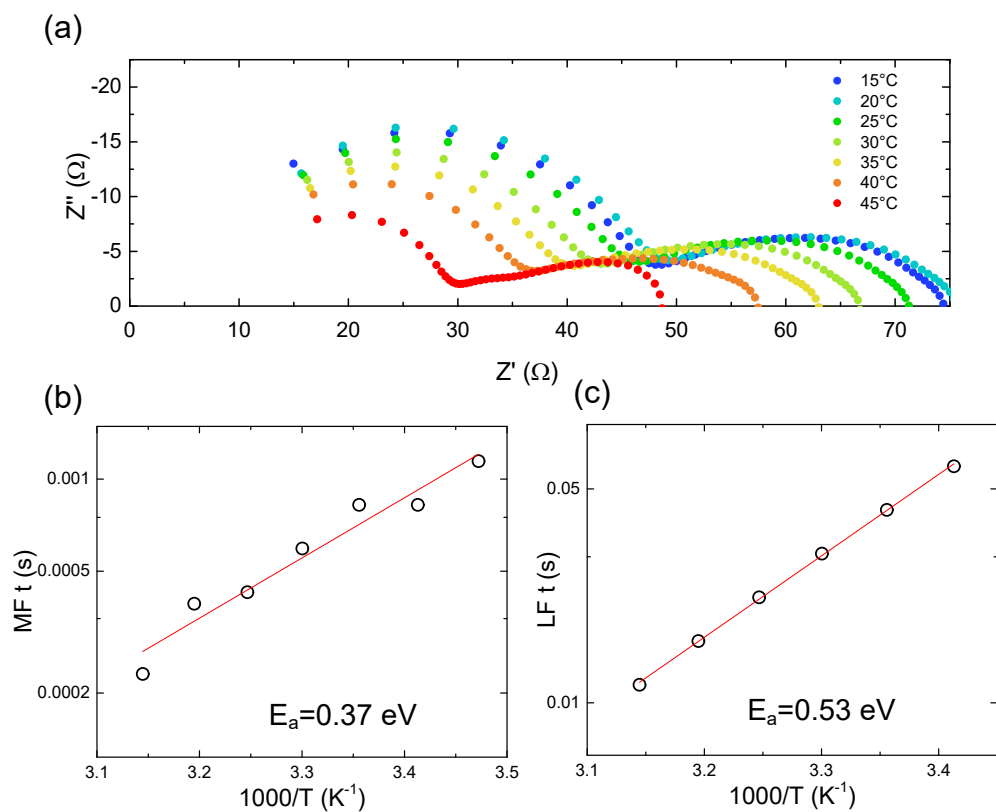

**Figure S6.** The change in  $\text{FA}_{0.83}\text{MA}_{0.17}\text{PbI}_3$  impedance with temperature: a) Nyquist plots, b) Arrhenius plot for the mid-frequency feature and c) for the low frequency feature.

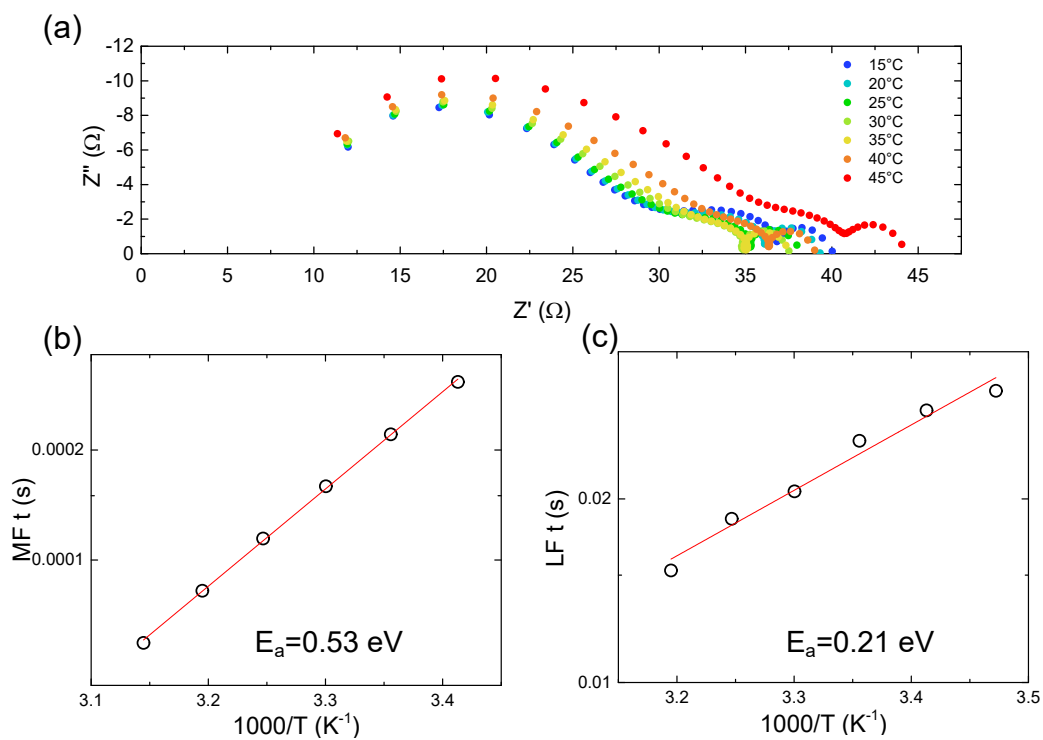

**Figure S7.** The change in  $\text{Cs}_{0.05}(\text{FA}_{0.83}\text{MA}_{0.17})_{0.95}\text{PbI}_3$  impedance with temperature: a) Nyquist plots, b) Arrhenius plot for the mid-frequency feature and c) for the low frequency feature.

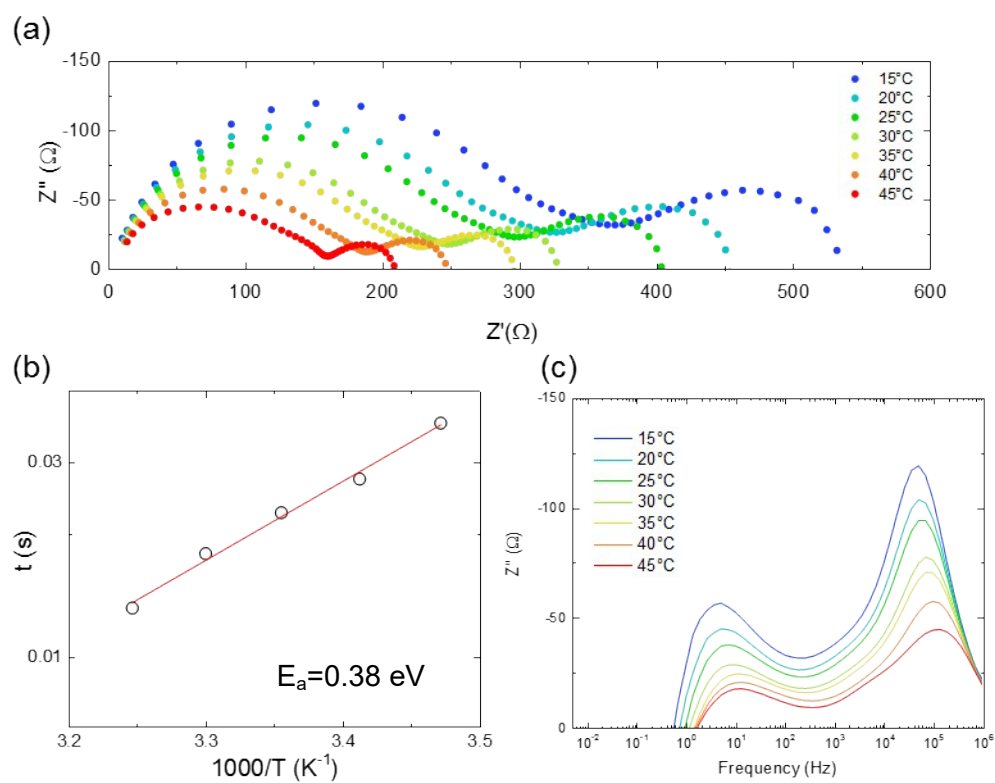

**Figure S8.** The change in  $\text{FA}_{0.83}\text{MA}_{0.17}\text{Pb}(\text{I}_{0.83}\text{Br}_{0.17})_3$  impedance with temperature: a) Nyquist plots, b) Arrhenius plot for the second semicircle and c) Cole plot

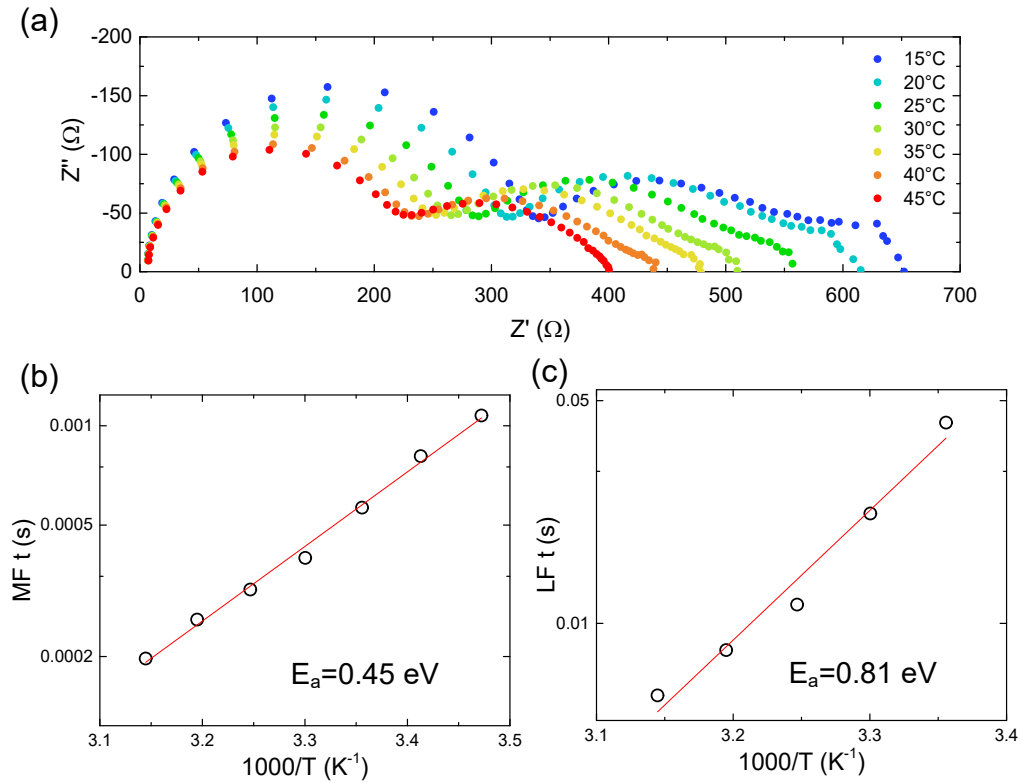

**Figure S9.** The change in  $\text{Cs}_{0.05}((\text{FA}_{0.83}\text{MA}_{0.17})_{0.95}\text{Pb}(\text{I}_{0.83}\text{Br}_{0.17})_3)$  impedance with temperature: a) Nyquist plots and b) Arrhenius plot for the low frequency semicircle

**Table S3.** Data for octahedral-corrected tolerance factor<sup>14</sup> (calculated for this work using relative proportions of each ion) and activation energy, including a selection of values from previous work.

| Material                                                                                                  | Tolerance Factor | Activation Energy | Ref.      |
|-----------------------------------------------------------------------------------------------------------|------------------|-------------------|-----------|
| $\text{FAPbI}_3$                                                                                          | 1.035            |                   | This work |
| $\text{FA}_{0.83}\text{MA}_{0.17}\text{PbI}_3$                                                            | 1.022            | 0.55              | This work |
| $\text{Cs}_{0.05}((\text{FA}_{0.83}\text{MA}_{0.17})_{0.95}\text{PbI}_3)$                                 | 1.013            | 0.21              | This work |
| $(\text{FA}_{0.83}\text{MA}_{0.17})_{0.95}\text{Pb}(\text{I}_{0.83}\text{Br}_{0.17})_3$                   | 1.031            | 0.38              | This work |
| $\text{Cs}_{0.05}((\text{FA}_{0.83}\text{MA}_{0.17})_{0.95}\text{Pb}(\text{I}_{0.83}\text{Br}_{0.17})_3)$ | 1.022            | 0.81              | This work |
| $\text{MAPbI}_3$                                                                                          | 0.957            | 0.4               | 15        |
| $\text{MAPb}(\text{I}_{0.975}\text{Br}_{0.025})_3$                                                        | 0.958            | 0.78              | 16        |
| $\text{MA}_{0.95}\text{DM}_{0.05}\text{PbI}_3$                                                            | 0.963            | 0.64              | 15        |
| $\text{MAPb}(\text{I}_{0.937}\text{Br}_{0.063})_3$                                                        | 0.959            | 1.12              | 16        |

## REFERENCES:

1. M. Saliba, T. Matsui, J.-Y. Seo, K. Domanski, J.-P. Correa-Baena, N. Mohammad K., S. M. Zakeeruddin, W. Tress, A. Abate, A. Hagfeldt, and M. Grätzel, *Energy Environ. Sci.*, 2016, **9**, 1989–1997.

2. M. T. Weller, O. J. Weber, P. F. Henry, A. M. Di Pumpo, and T. C. Hansen, *Chem. Commun.*, 2015, **51**, 4180–4183.
3. O. J. Weber, B. Charles, and M. T. Weller, *J. Mater. Chem. A*, 2016, **4**, 15375–15382.
4. M. Senno and S. Tinte, *Phys. Chem. Chem. Phys.*, 2021, **23**, 7376–7385.
5. M. T. Weller, O. J. Weber, J. M. Frost, and A. Walsh, *J. Phys. Chem. Lett.*, 2015, **6**, 3209–3212.
6. D. Ghosh, A. R. Smith, A. B. Walker, and M. S. Islam, *Chem. Mater.*, 2018, **30**, 5194–5204.
7. D. M. Trots and S. V Myagkota, *J. Phys. Chem. Solids*, 2008, **69**, 2520–2526.
8. X. Zheng, C. Wu, S. K. Jha, Z. Li, K. Zhu, and S. Priya, *ACS Energy Lett.*, 2016, **1**, 1014–1020.
9. A. Poglitsch and D. Weber, *J. Chem. Phys.*, 1987, **87**, 6373–6378.
10. Y. Wang, X. Lü, W. Yang, T. Wen, L. Yang, X. Ren, L. Wang, Z. Lin, and Y. Zhao, *J. Am. Chem. Soc.*, 2015, **137**, 11144–11149.
11. D. Wiedemann, J. Breternitz, D. W. Paley, and S. Schorr, *J. Phys. Chem. Lett.*, 2021, **12**, 2358–2362.
12. H. Singh, R. Fei, Y. Rakita, M. Kulbak, D. Cahen, A. M. Rappe, and A. I. Frenkel, *Phys. Rev. B*, 2020, **101**, 54302.
13. C.-J. Yu, U.-H. Ko, S.-G. Hwang, Y.-S. Kim, U.-G. Jong, Y.-H. Kye, and C.-H. Ri, *Phys. Rev. Mater.*, 2020, **4**, 45402.
14. W. Travis, E. N. K. Glover, H. Bronstein, D. O. Scanlon, and R. G. Palgrave, *Chem. Sci.*, 2016, **7**, 4548–4556.
15. D. W. Ferdani, S. R. Pering, D. Ghosh, P. Kubiak, A. B. Walker, S. E. Lewis, A. L. Johnson, P. J. Baker, M. S. Islam, and P. J. Cameron, *Energy Environ. Sci.*, 2019, **12**, 2264–2272.
16. R. García-Rodríguez, D. Ferdani, S. Pering, P. J. Baker, and P. J. Cameron, *J. Mater. Chem. A*, 2019, **7**, 22604–22614.
